# Supplementary material for: Structural and Functional Characterization of β−lytic Protease from Lysobacter capsici VKM B−2533T
Source: MDPI journal article supplement (doi:10.3390/ijms232416100), 2022-12-17
Supplement: s1 [file s1]

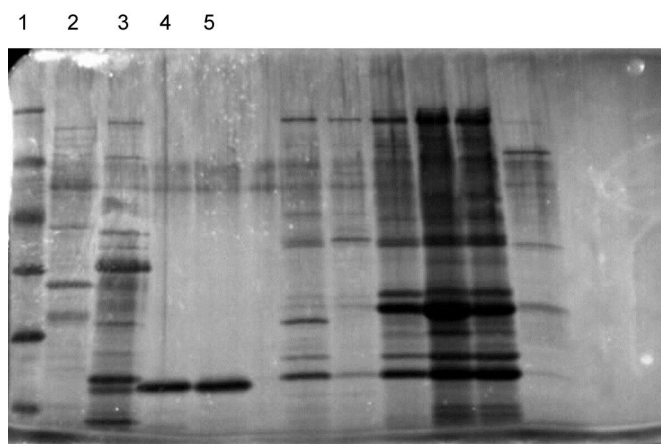

**Supplementary Figure S1.** Original gel images for Figure 1: lane 1 corresponds to M of Figure 1; lanes 2 and 3, to culture fluid samples of *P. aeruginosa* and *L. capsici* VKM B-2533<sup>T</sup>, respectively, of Figure 1; lanes 4 and 5, samples of *P. aeruginosa* LasA and *L. capsici* VKM B-2533<sup>T</sup> Blp, respectively, of Figure 1.

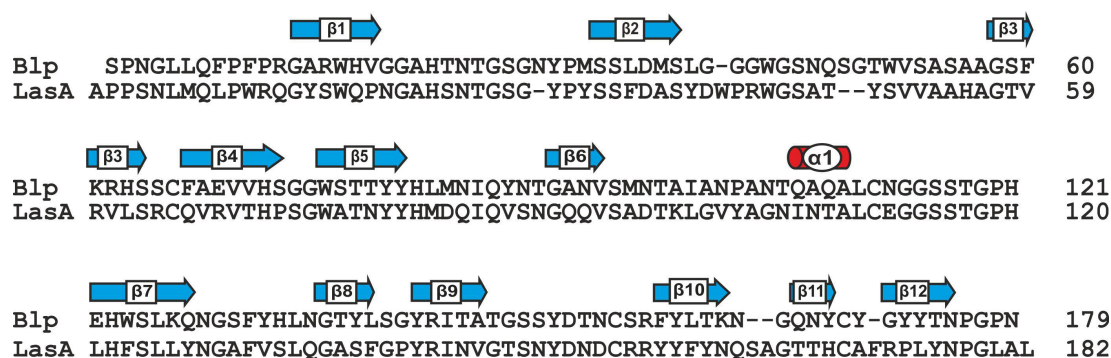

**Supplementary Figure S2.** Alignment of the spatial structures of *L. capsici* VKM B-2533<sup>T</sup> Blp and *P. aeruginosa* LasA.
